# Supplementary material for: Chemical Constituents and Antibacterial Properties of Indocalamus latifolius McClure Leaves, the Packaging Material for “Zongzi”
Source: MDPI journal article supplement (doi:10.3390/molecules200915686), 2015-08-28
Supplement: s1 [file s1]

## Supplementary Materials

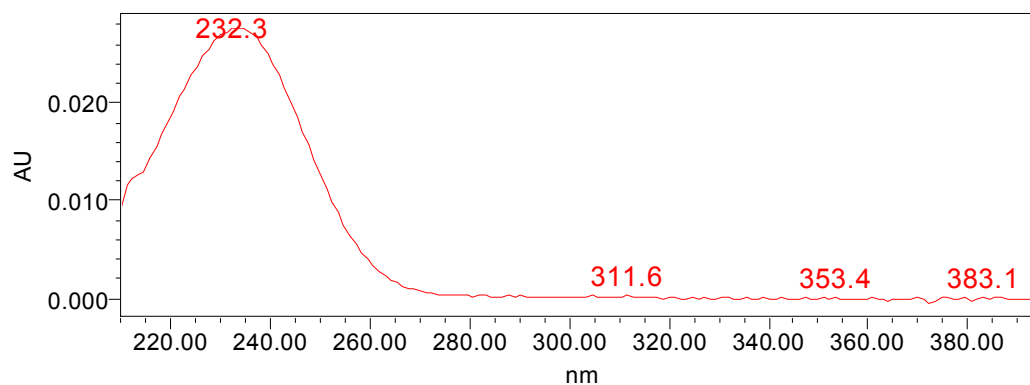

**Figure S1.** UV of compound 2.

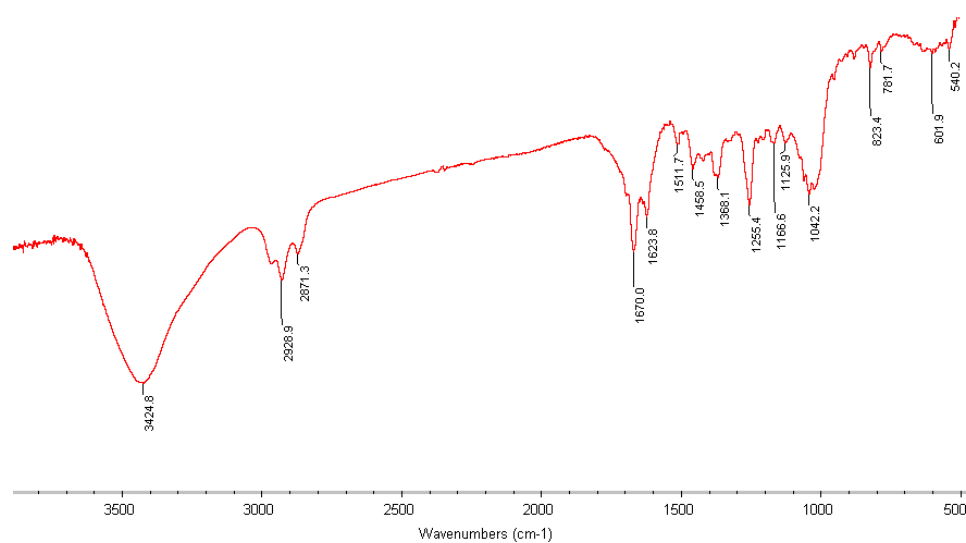

**Figure S2.** IR of compound 2.

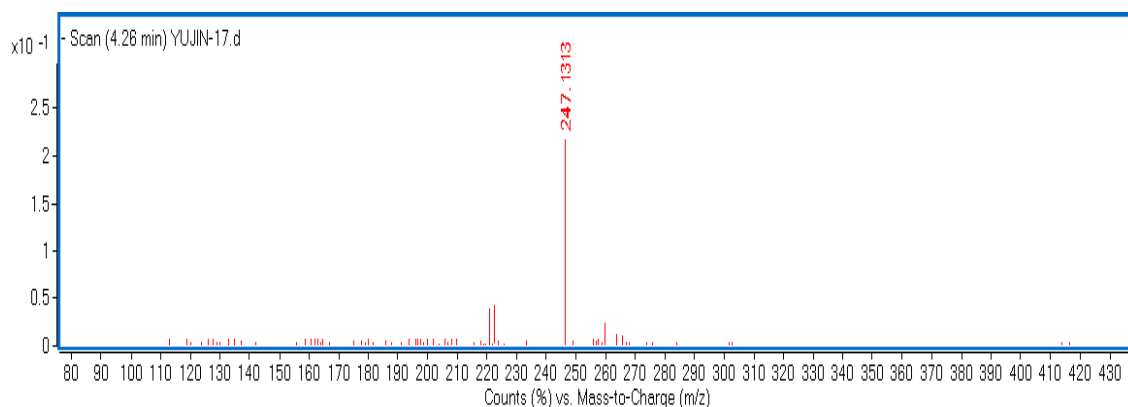

**Figure S3.** HRESIMS of compound 2.

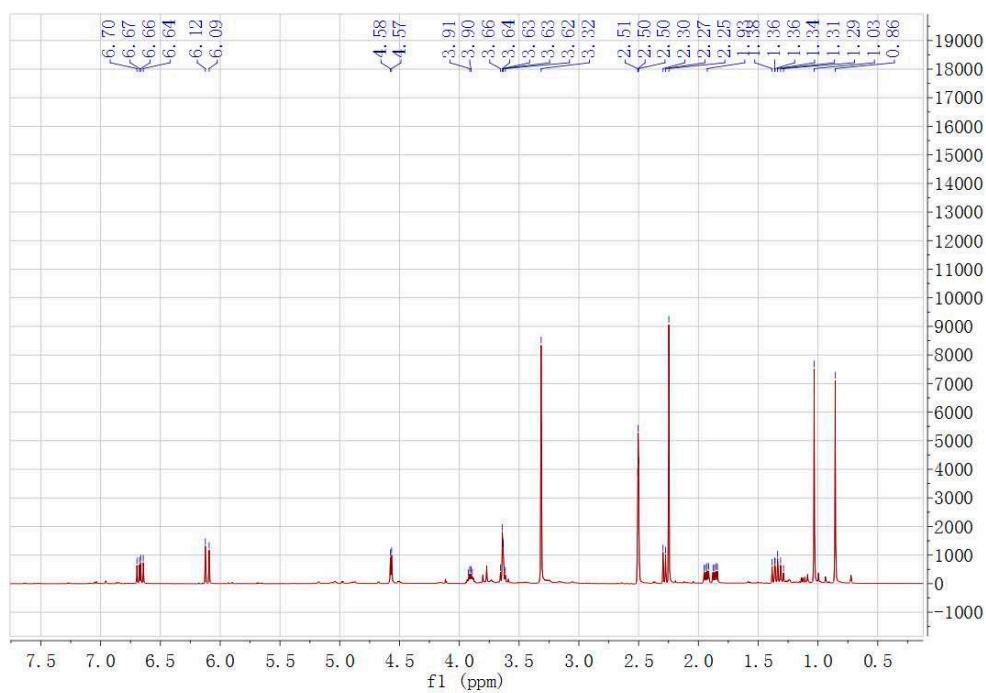

**Figure S4.** <sup>1</sup>H-NMR of compound **2** (Data acquired in DMSO-*d*<sub>6</sub> at 500 MHz).

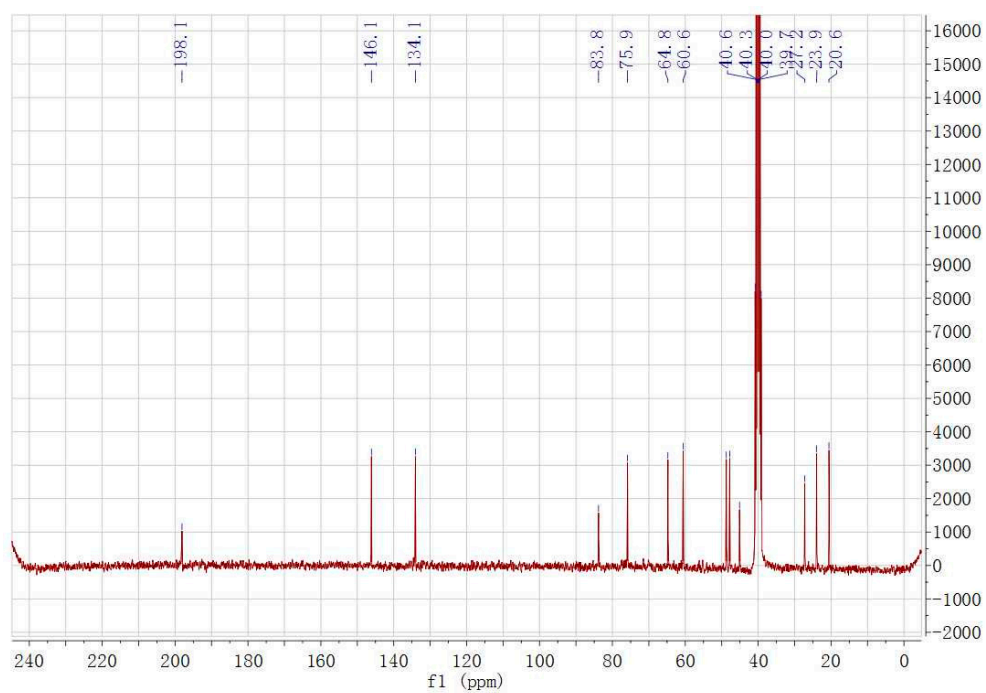

**Figure S5.** <sup>13</sup>C-NMR of compound **2** (Data acquired in DMSO-*d*<sub>6</sub> at 500 MHz).

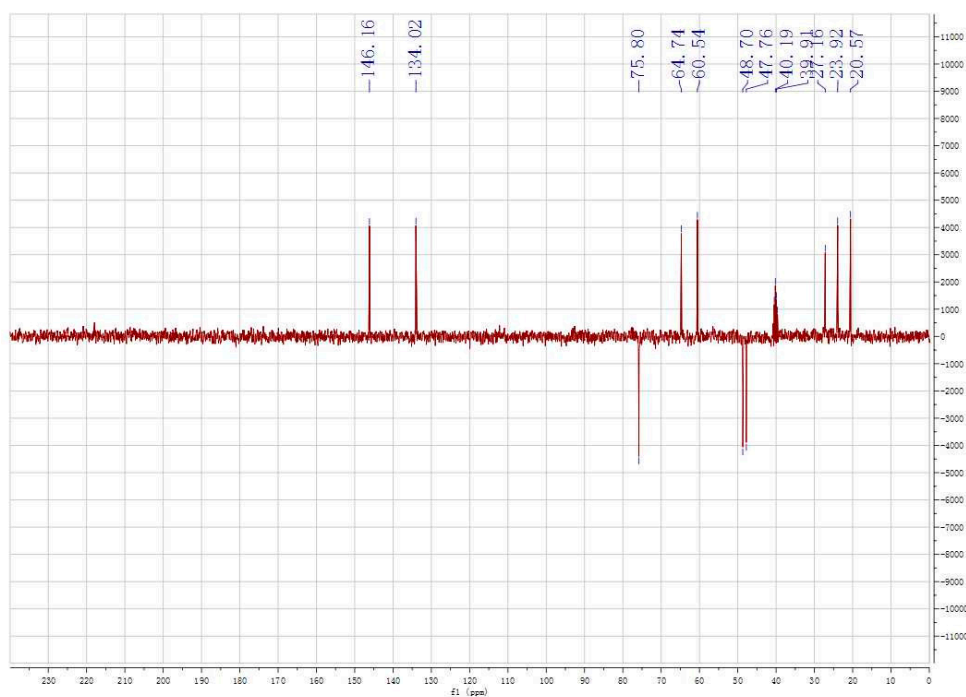

**Figure S6.** DEPT 135° of compound **2** (Data acquired in DMSO-*d*<sub>6</sub> at 500 MHz).

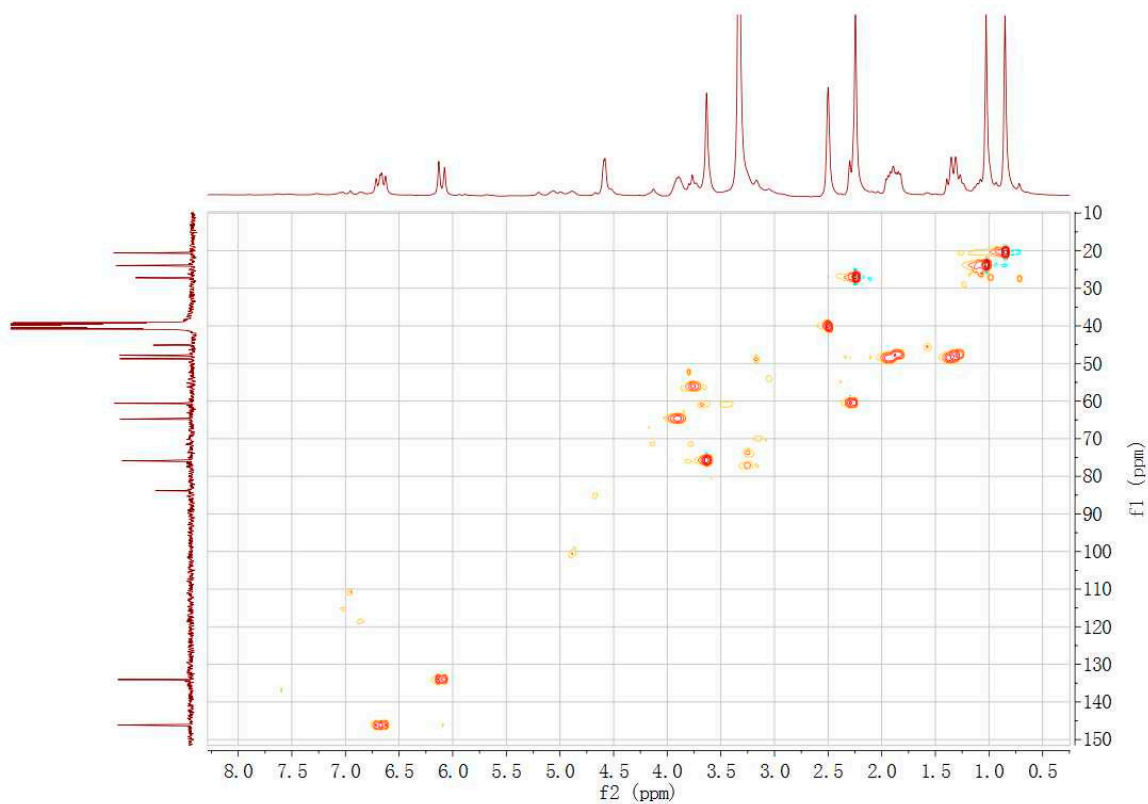

**Figure S7.** HSQC of compound **2** (Data acquired in DMSO-*d*<sub>6</sub> at 300 MHz).

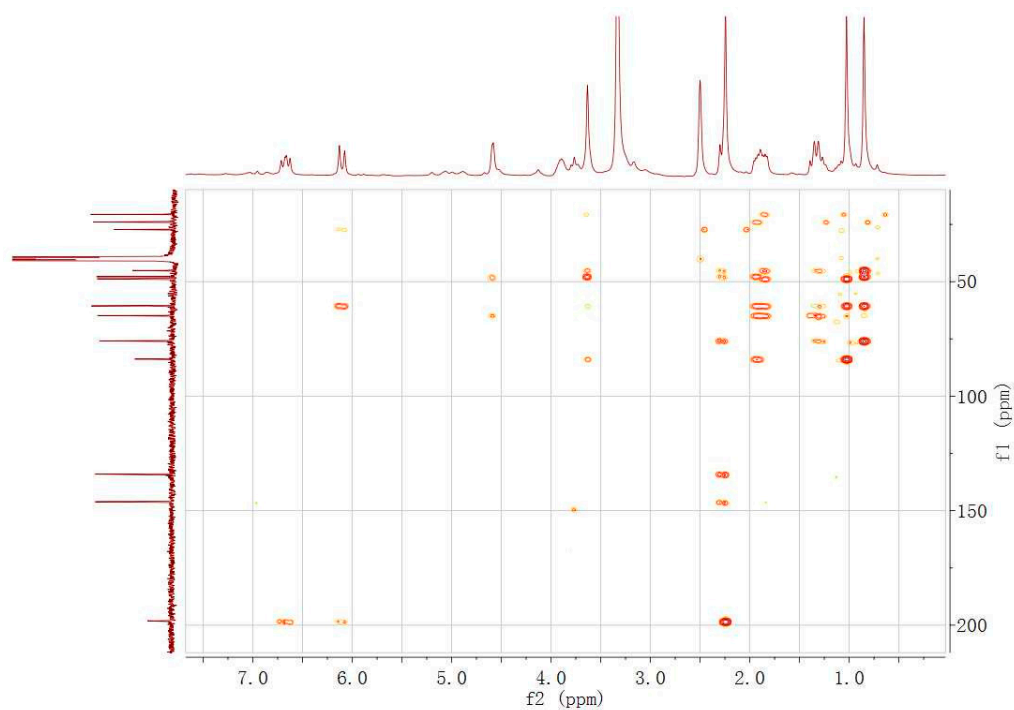

**Figure S8.** HMBC of compound **2** (Data acquired in DMSO-*d*<sub>6</sub> at 300 MHz).

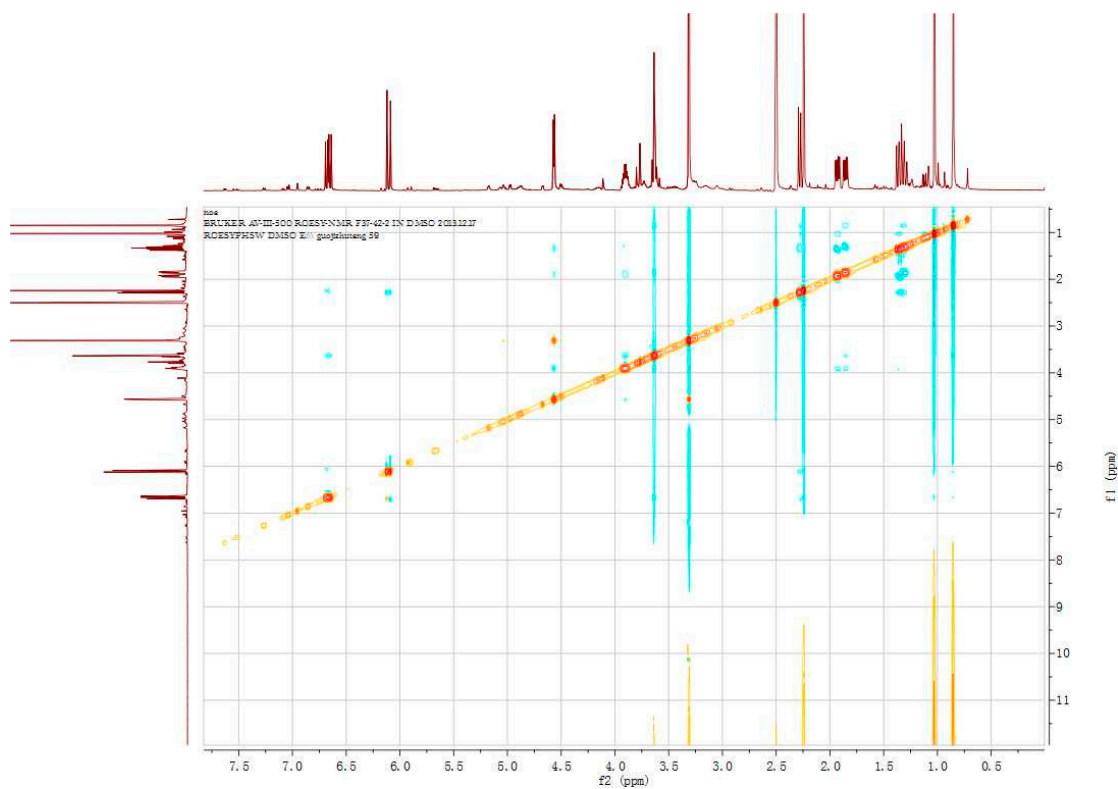

**Figure S9.** NOESY of compound **2** (Data acquired in DMSO-*d*<sub>6</sub> at 500 MHz).

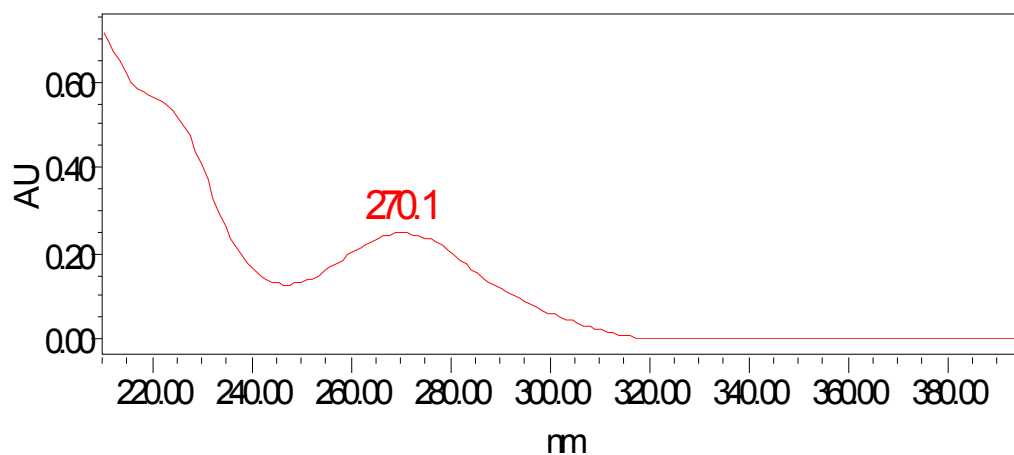

**Figure S10.** UV of compound 7.

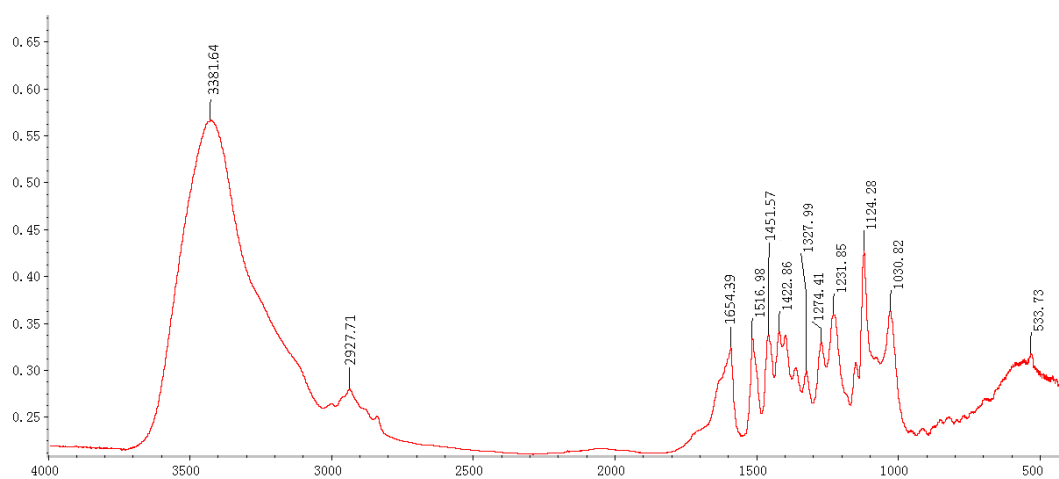

**Figure S11.** IR of compound 7.

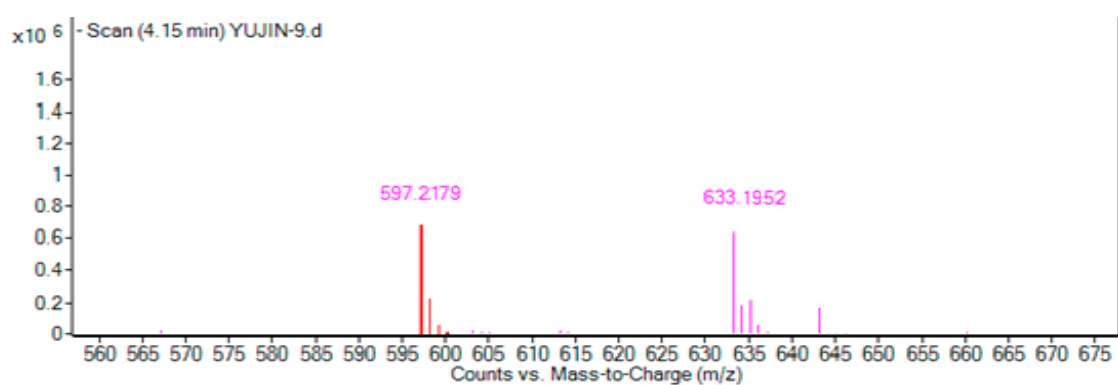

**Figure S12.** HRESIMS of compound 7.

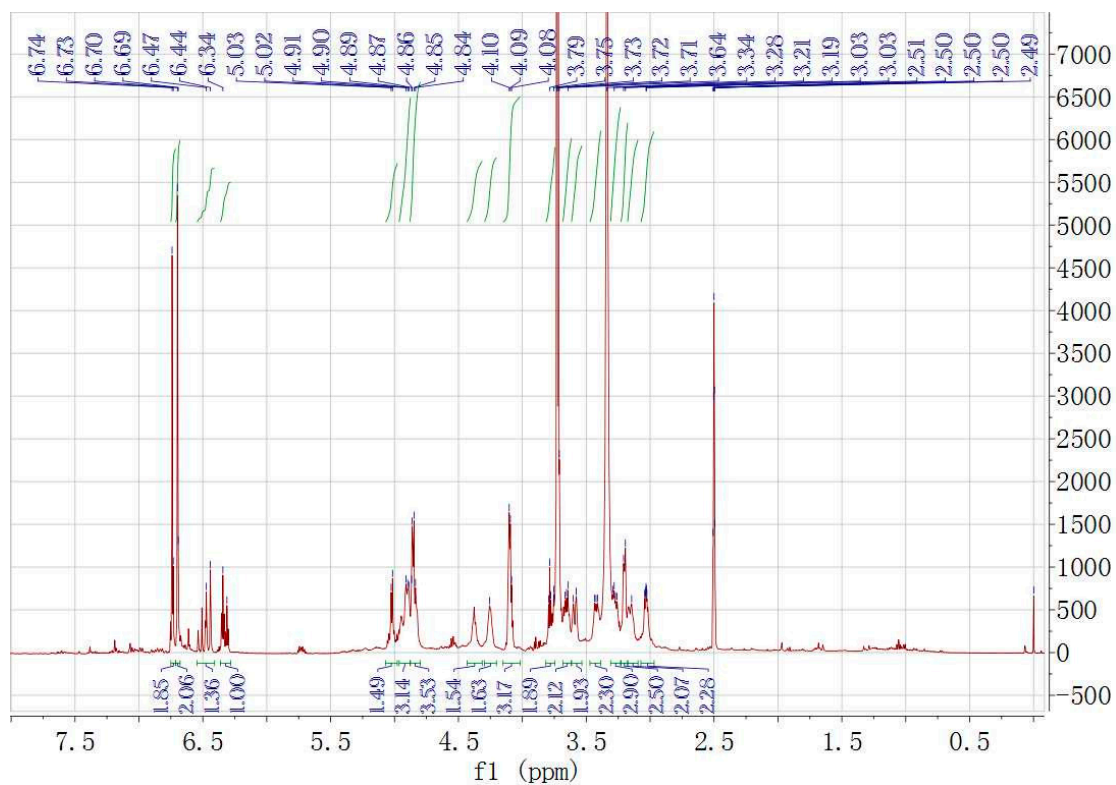

**Figure S13.** <sup>1</sup>H-NMR compound 7 (Data acquired in DMSO-*d*<sub>6</sub> at 500 MHz).

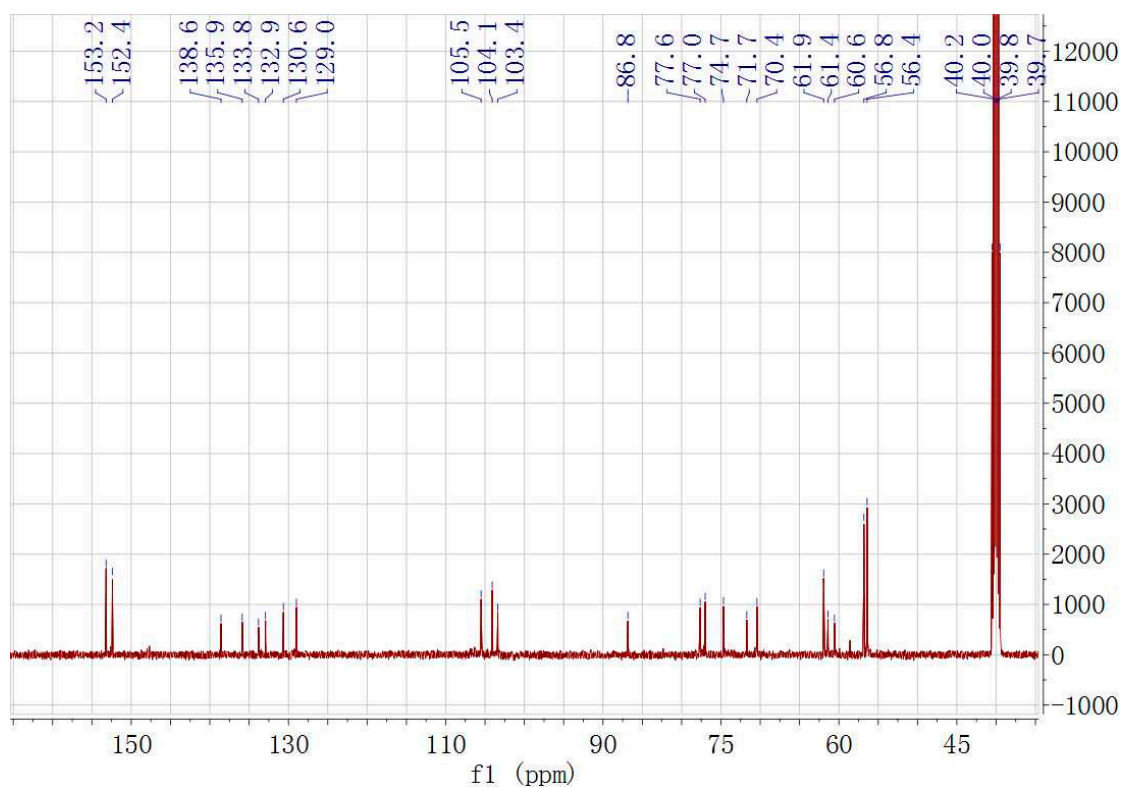

**Figure S14.** <sup>13</sup>C-NMR compound 7 (Data acquired in DMSO-*d*<sub>6</sub> at 500 MHz).

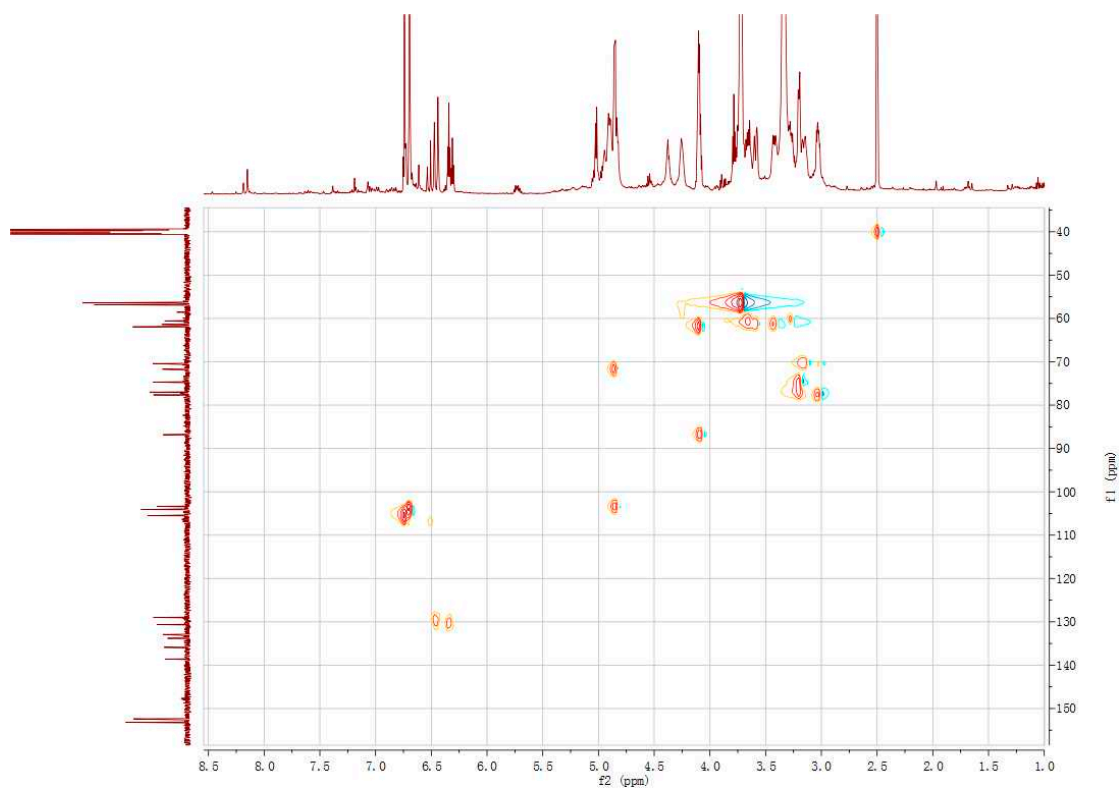

**Figure S15.** HSQC compound 7 (Data acquired in DMSO-*d*<sub>6</sub> at 300 MHz).

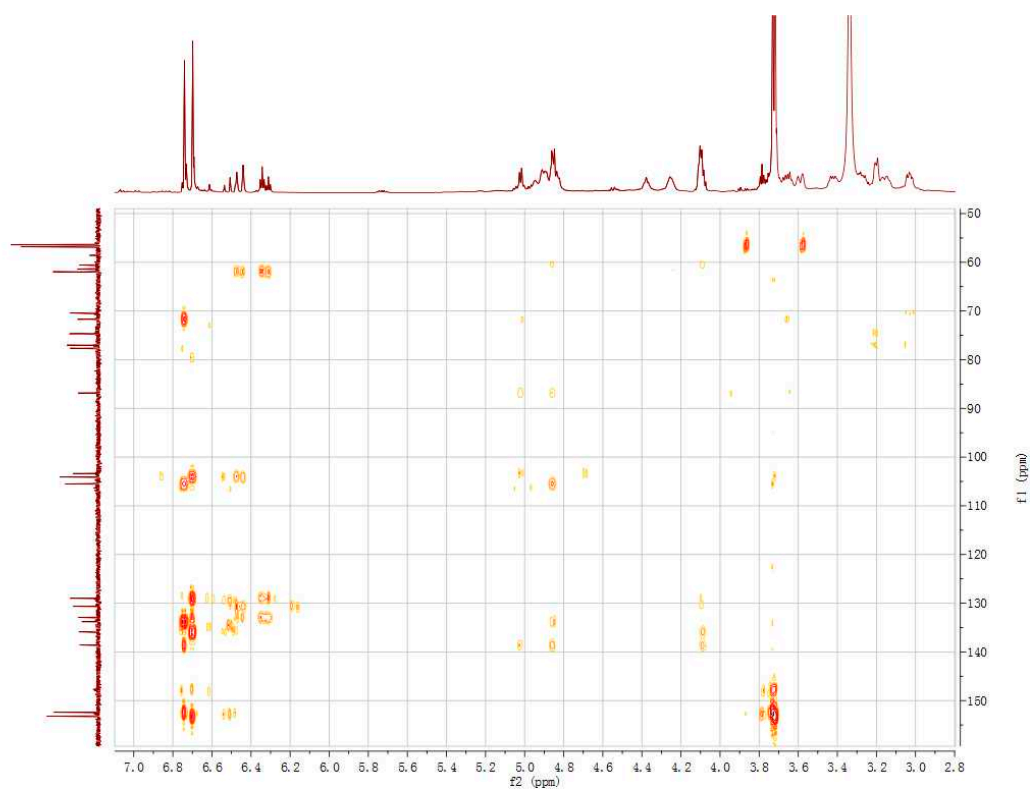

**Figure S16.** HMBC compound 7 (Data acquired in DMSO-*d*<sub>6</sub> at 300 MHz).

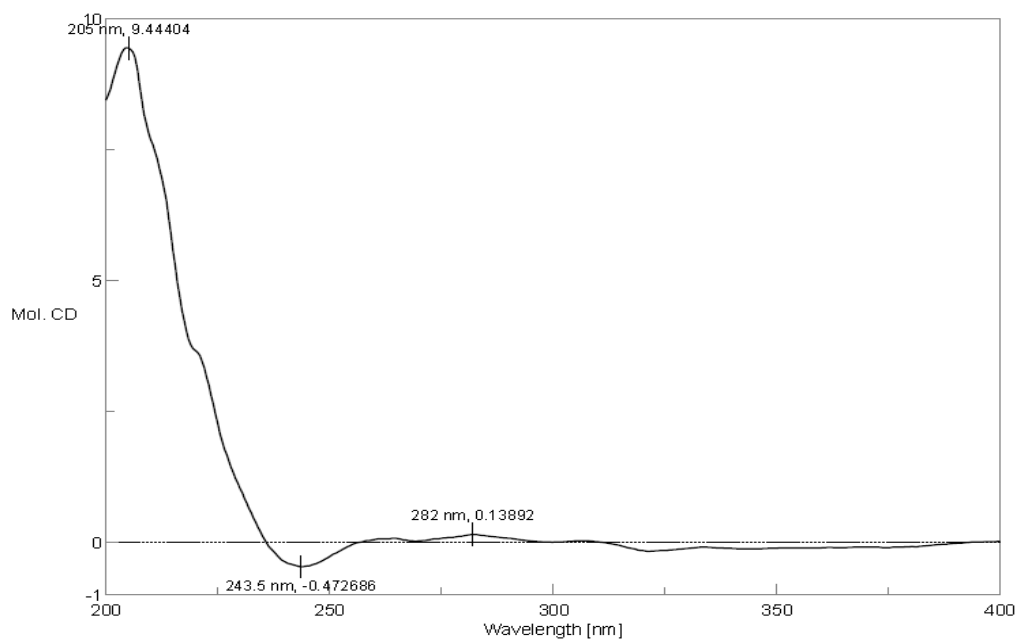

**Figure S17.** CD of compound 7.

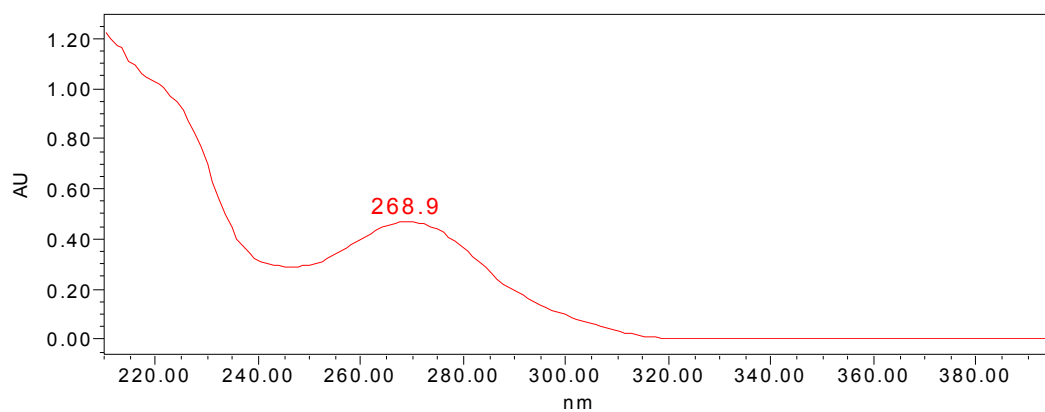

**Figure S18.** UV of compound 8.

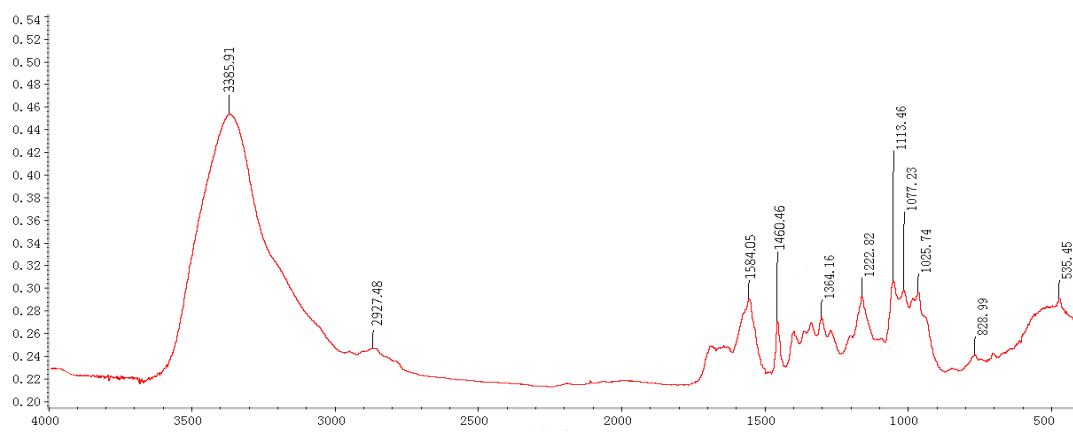

**Figure S19.** IR of compound 8.



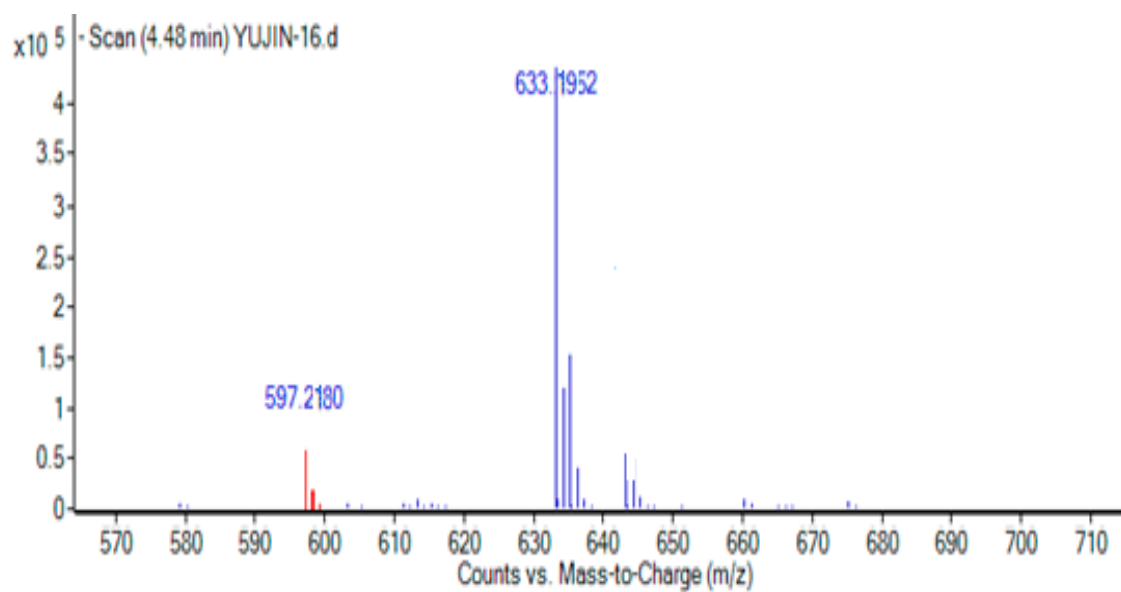

**Figure S20.** HRESIMS of compound **8**.

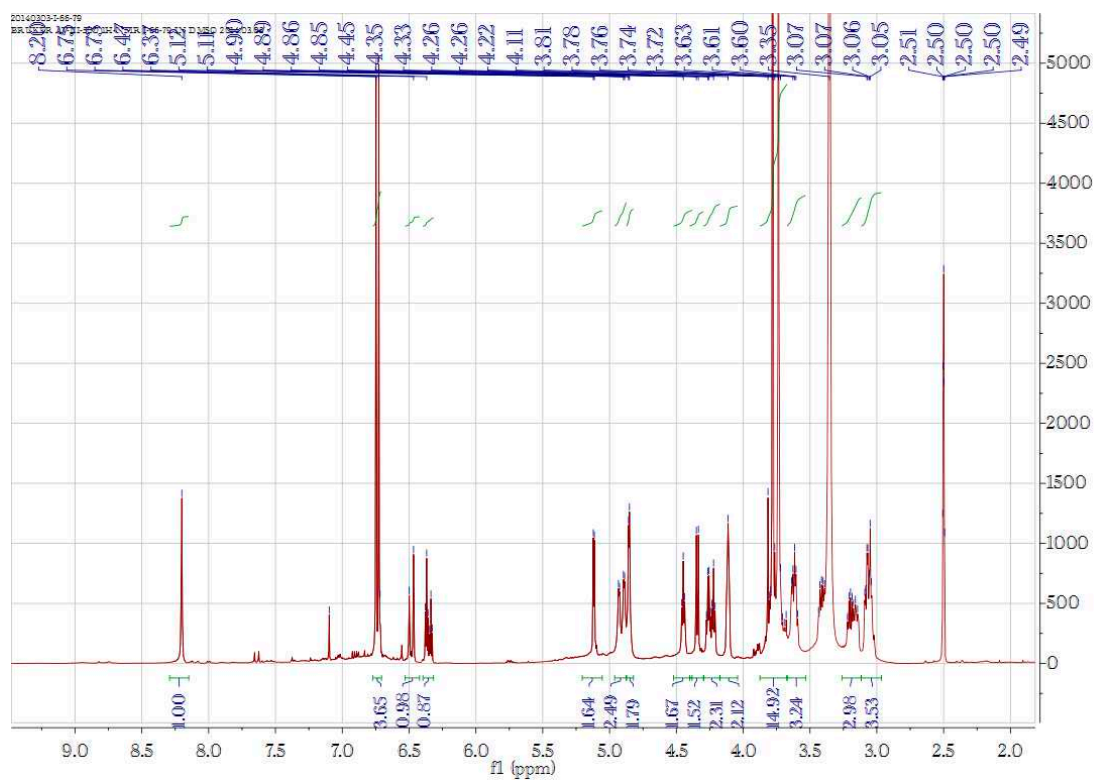

**Figure S21.** <sup>1</sup>H-NMR of compound **8** (Data acquired in DMSO-*d*<sub>6</sub> at 500 MHz).

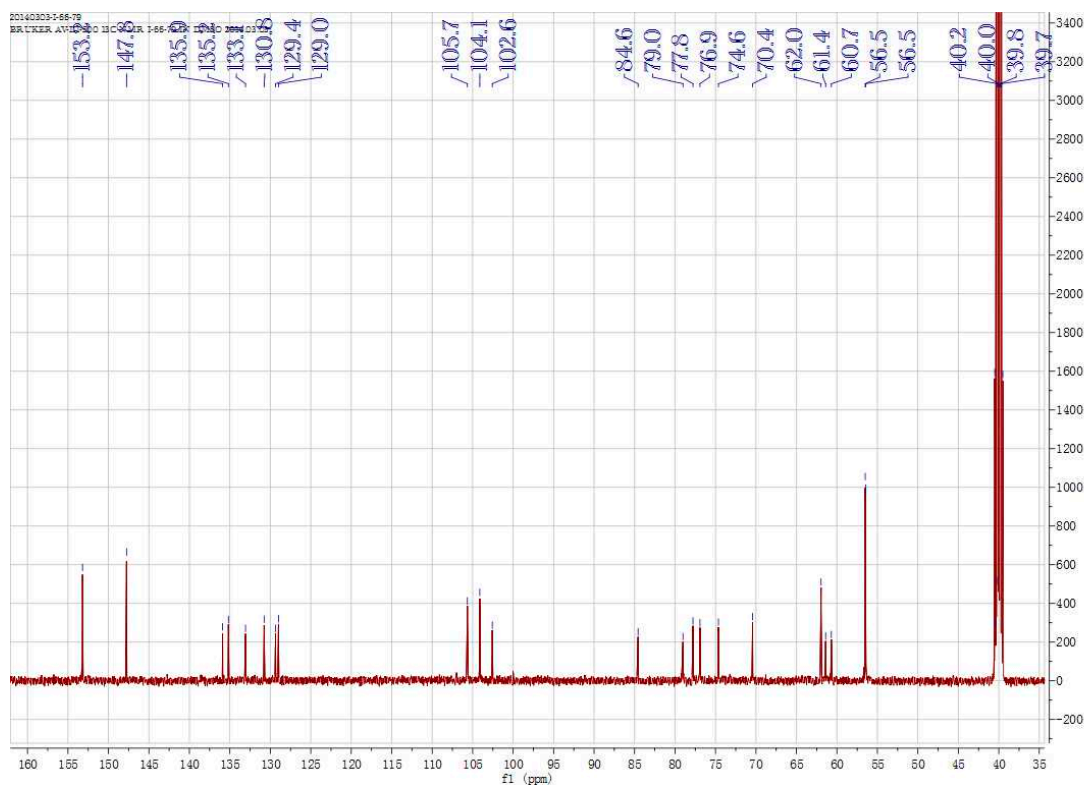

**Figure S22.** <sup>13</sup>C-NMR of compound **8** (Data acquired in DMSO-*d*<sub>6</sub> at 500 MHz).

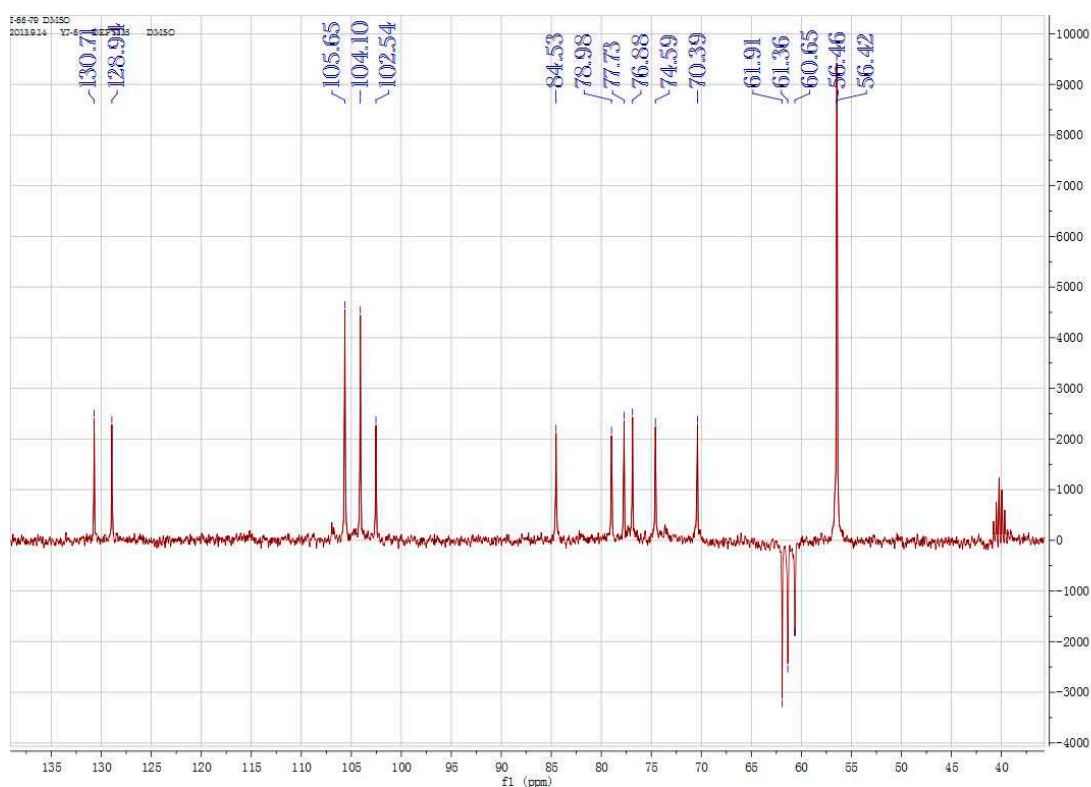

**Figure S23.** DEPT 135° of compound **8** (Data acquired in DMSO-*d*<sub>6</sub> at 300 MHz).

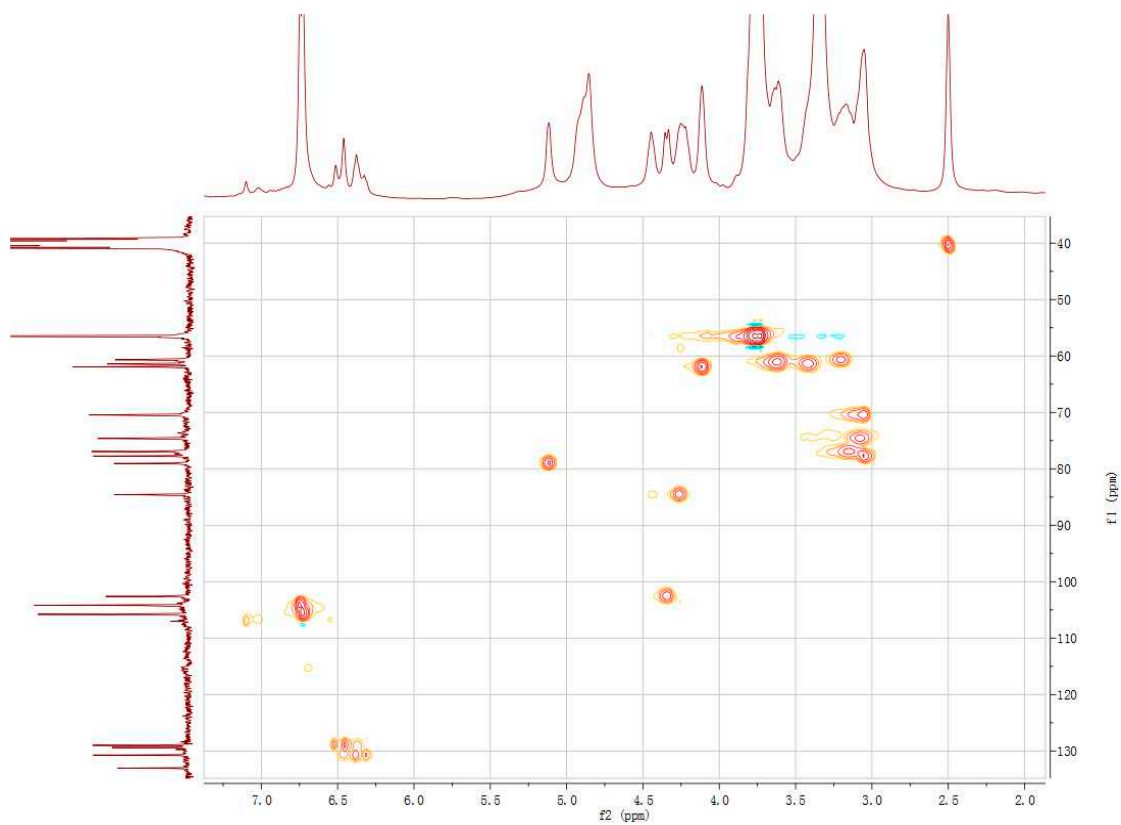

**Figure S24.** HSQC of compound **8** (Data acquired in DMSO-*d*<sub>6</sub> at 300 MHz).

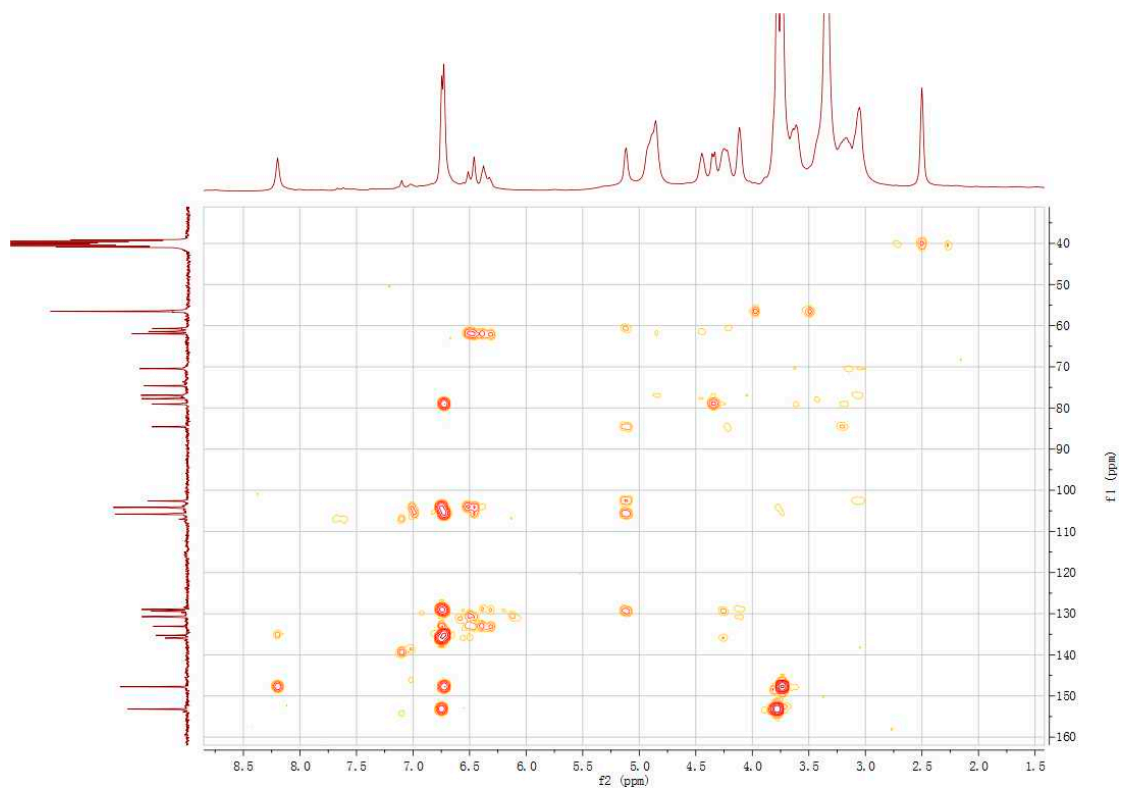

**Figure S25.** HMBC of compound **8** (Data acquired in DMSO-*d*<sub>6</sub> at 300 MHz).

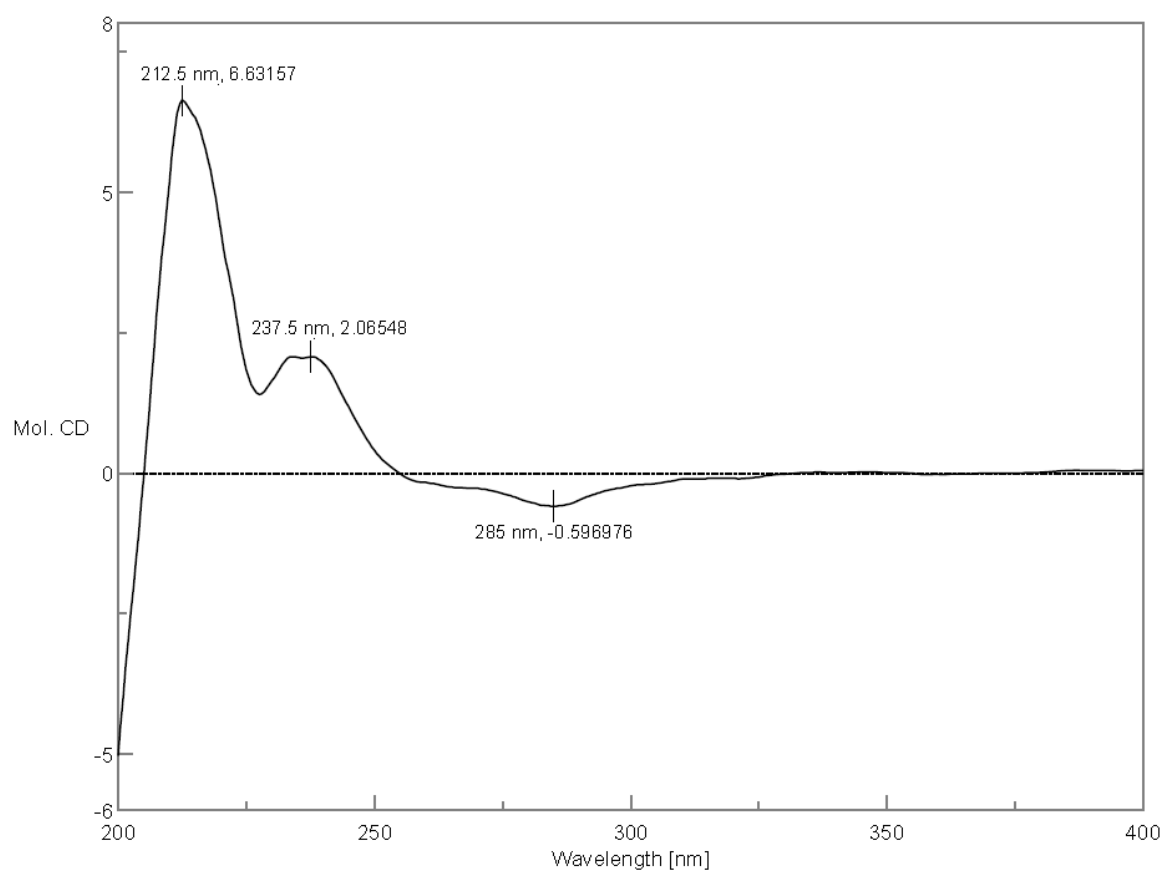

**Figure S26.** CD of compound **8**.

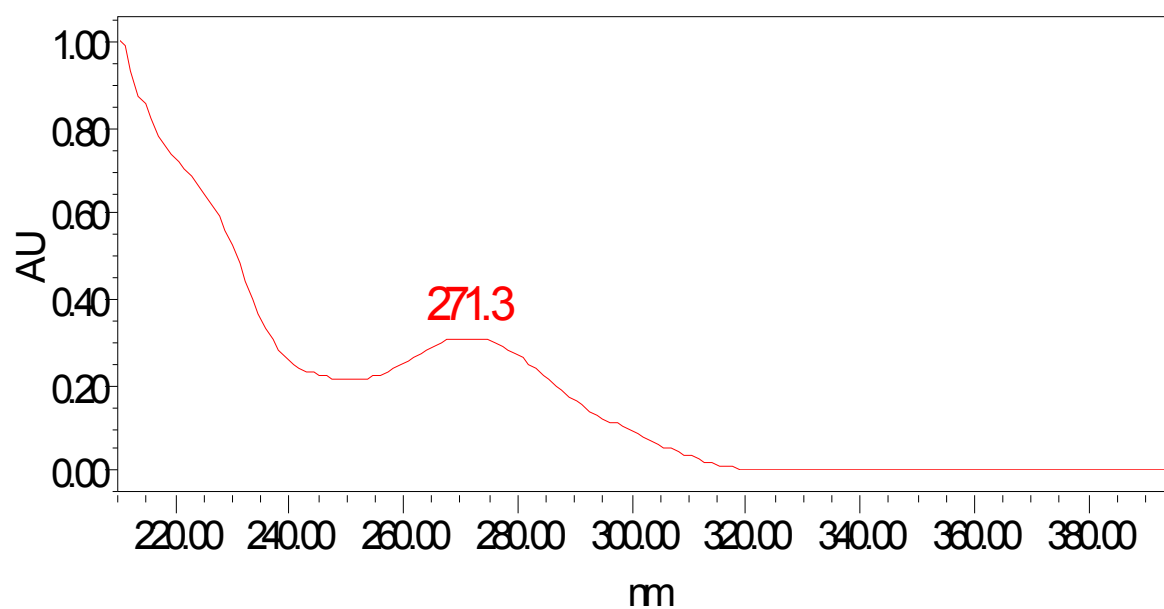

**Figure S27.** UV of compound **10**.

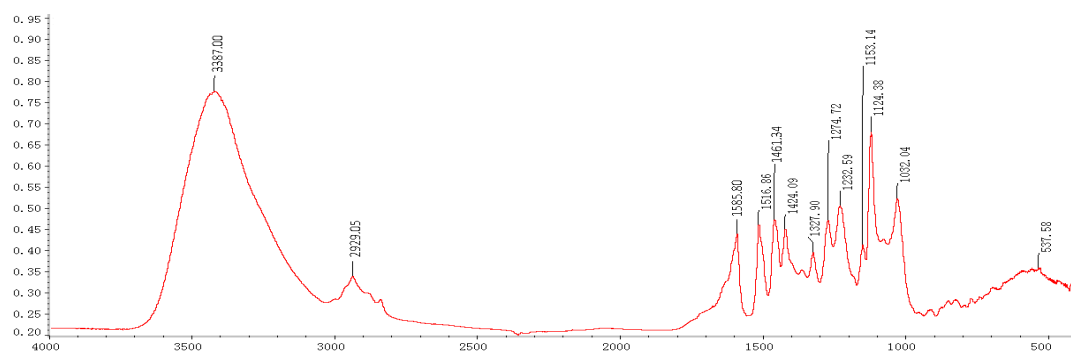

Figure S28. IR of compound **10**.

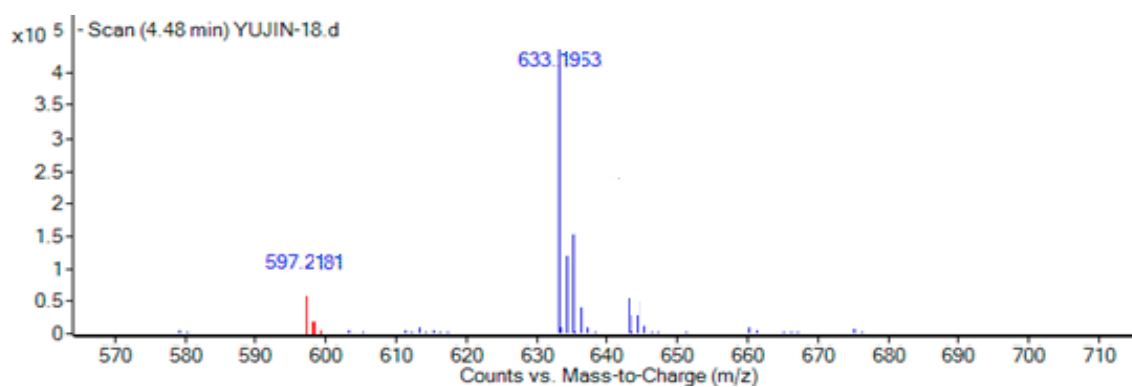

Figure S29. HRESIMS of compound **10**.

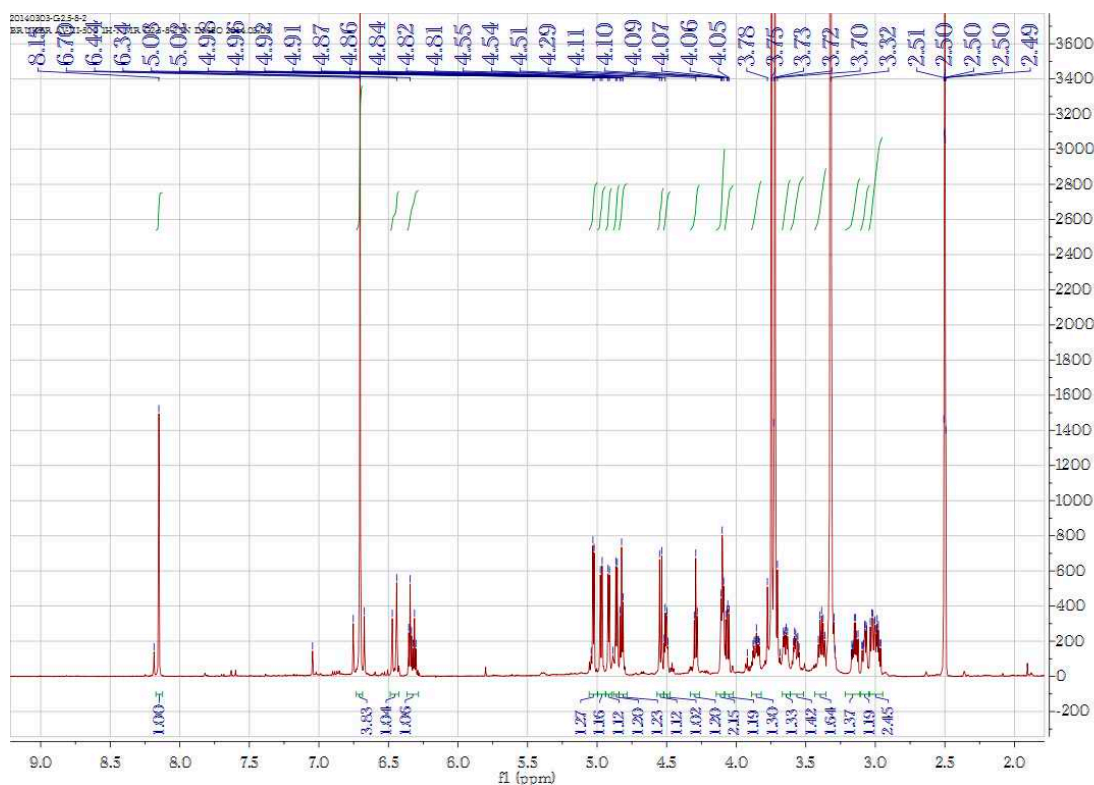

Figure S30.  $^1\text{H}$ -NMR of compound **10** (Data acquired in  $\text{DMSO}-d_6$  at 500 MHz).

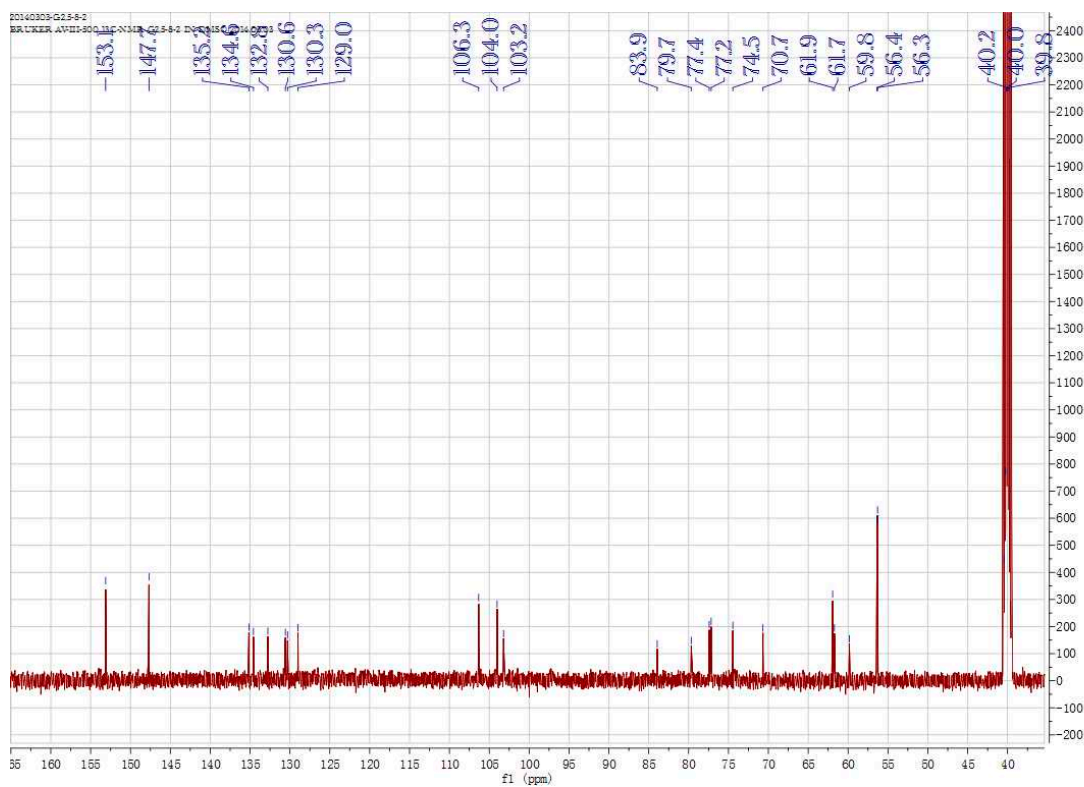

**Figure S31.** <sup>13</sup>C-NMR of compound 10 (Data acquired in DMSO-*d*<sub>6</sub> at 500 MHz).

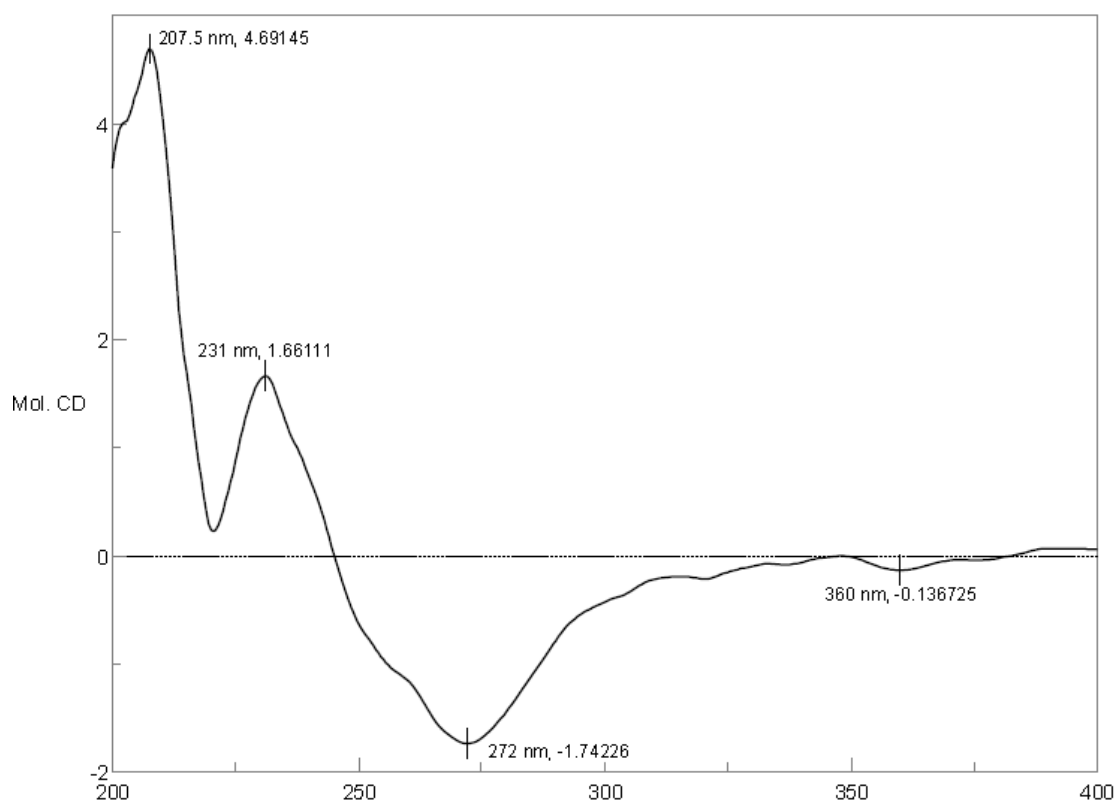

**Figure S32.** CD of compound 10.
